# Supplementary material for: Cu(In,Ga)Se2:Te Thin Films for Stoichiometric Compensation by Using Co-Sputtering and Rapid Thermal Annealing
Source: MDPI journal article supplement (doi:10.3390/app13074284), 2023-03-28
Supplement: s1 [file s1]

Archive with 1 entries (1 files):
- applsci-2273430-supplementary.pdf
